# Supplementary material for: Facile preparation of a highly sensitive nonenzymatic glucose sensor based on multi-walled carbon nanotubes decorated with electrodeposited metals
Source: Royal Society of Chemistry journal article supplement (doi:10.1039/c4ra11465e), 2014-12-04
Supplement: c4ra11465e1.pdf [file c4ra11465e1.pdf]

### Supplementary Information

## Facile preparation of a highly sensitive nonenzymatic glucose sensor based on multi-walled carbon nanotubes decorated with electrodeposited metals

Kuo Chiang Lin, Yu Tsung Hung and Shen Ming Chen\*

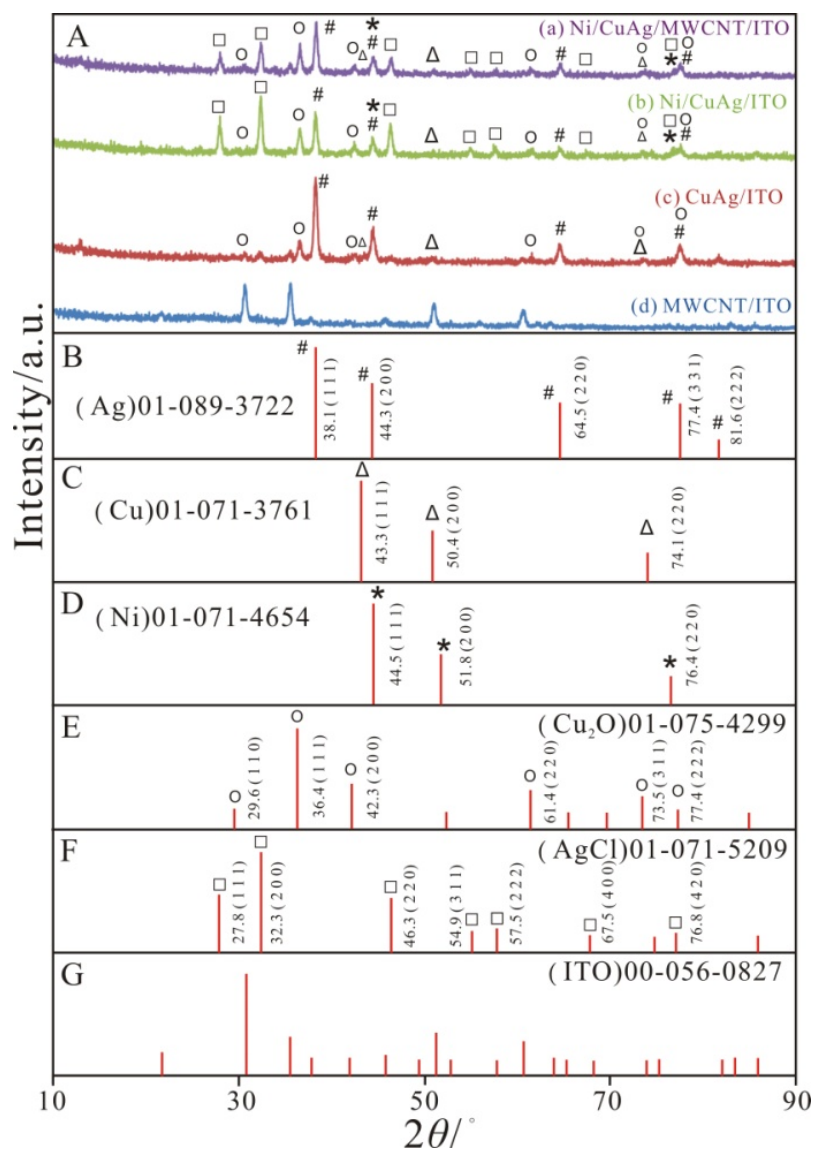

**Fig. S1** (A) XRD spectra of different modified ITO electrodes. Standard XRD patterns: (B) Ag, (C) Cu, (D) Ni, (E) Cu<sub>2</sub>O, (F) AgCl, and (G) ITO, respectively.
